# Supplementary material for: Diversity and spatial genetic structure of the common opossum (Didelphis marsupialis) in an urban matrix of Northwestern Colombia
Source: Springer Nature journal article supplement (doi:10.1007/s42991-024-00434-2), 2024-07-24
Supplement: MOESM1 [file 42991_2024_434_MOESM1_ESM.xlsx]

## Sheet: Hoja1
Codigo genetica	# Acta	Sitio	Barrio	Dirección	Latitud	Longitud	Altitud	Tipo de muestra	Extracción	identificado por	Fecha
CAL-01	N/A	Caldas			6.0861	-75.6245		Pelo,heces, Carillo		Tomás Villada Cadavid	2022-02-18
CAL-02	N/A	Caldas			6.08622	-75.6247		Pelo,heces, Carillo		Tomás Villada Cadavid	2022-02-19
CPB-01	N/A	Copacabana			6.37177	-75.5248		Pelo, Heces, Saliva	si	Tomás Villada Cadavid	2022-01-16
CPB-02	N/A	Copacabana	Navarra		6.33022	-75.5335		Pelo, Heces, Saliva		Tomás Villada Cadavid	2022-01-21
CPB-03	N/A	Copacabana			6.34709	-75.4914		Pelo, Heces, Saliva		Tomás Villada Cadavid	2022-01-26
CPB-04	N/A	Copacabana			6.34709	-75.4914		Pelo, Heces, Saliva		Tomás Villada Cadavid	2022-01-26
CPB-05	N/A	Copacabana			6.34709	-75.4914		Pelo, Heces, Saliva		Tomás Villada Cadavid	2022-01-26
EDP01	20659e	Medellin	Campo alegre	Cl 42 # 95	6.24862	-75.6016		Sangre	Si	Johana Perez	2021-09-06
EDP02	19475e	Medellin		Cra 39 # 51-12	6.2471	-75.5586		Sangre	Si	Johana Perez	2021-09-06
EDP03	20447e	Medellin	Belen las margaritas	Cl 12 # 25A-11	6.18709	-75.5637		Sangre	Si	Carolina Henao	2021-09-09
EDP04	20396e	Medellin	San Diego	Cr 42 A# 30D8	6.20482	-75.5709		Sangre	Si	Carolina Henao	2021-09-09	Hembra
EDP05	20828e	Medellin	Poblado	Cl 10 a #22 - 04	6.20832	-75.5528		Sangre	Si	Johana Perez	2021-10-04
EDP06	20784e	Medellin	Robledo Villa sofia	Cr 91#90	6.27701	-75.5969		Sangre	Si	Sara Cardona	2021-10-01
EDP07	20761e	Medellin	versalles 2	cra 25# 69d-36	6.26338	-75.5406		Sangre	Si	Liliana Roa	2021-09-28
EDP08	20405e	Medellin		Cr 77 B # 53A -35	6.26622	-75.5909		Tejido	Si	Juliana Tabares	2021-09-08
EDP09	20450e	Envigado	El Dorado	Cl 27D #27 sur-104	6.16976	-75.5697	1.612	Tejido	Si	Sara Cardona	2021-09-10
EDP10	20452e	Medellin		Cl 65 C #32A-32	6.23585	-75.5844		Tejido	Si	Sara Cardona	2021-09-10
EDP11	20521e	Medellín	Belén Rincón	Cl 1 # 79 - 26	6.20738	-75.5594		Tejido	Si	Liliana Roa	2021-09-14
EDP12	20538e	Medellin	Jardin de los colores	Cr76 A# 53-35	6.26477	-75.5903		Tejido	Si	Juliana Tabares	2021-09-15
EDP13	20558e	La Estrella		Cl 87 sur #55-591	6.15078	-75.6419		Tejido	Si	Carolina Henao	2021-09-16
EDP14	20527e	Medellin	La america	Cl 42 #86 A35	6.24593	-75.6099		Tejido	Si	Carolina Henao	2021-09-16
EDP15	21561e	Medellin	San Javier	Cl 58 B #85 B-8	6.27339	-75.5999		Tejido	Si	Carolina Henao	2021-09-16
EDP16	20520e	Medellin	Poblado	Cr 30 # 7A- 310	6.20662	-75.56		Tejido	Si	Liliana Roa	2021-09-14
EDP17	20610e	Medellin	Robledo la campiña	Cl 64 B #98-01	6.2832	-75.6072		Tejido	Si	Carolina Henao	2021-09-21
EDP18	20611e	Medellin	Los colores	Cl 53 #77B-36	6.26525	-75.5919		Tejido	Si	Carolina Henao	2021-09-21
EDP19	20618e	medellin	Girardot	Cl 103 D# 68A 55	6.29962	-75.5697		Tejido	Si	Carolina Henao	2021-09-21
EDP20	20627e	Medellin	Cañada negra	Cl 125 #49-19	6.30635	-75.5502		Tejido	Si	Juliana Tabares	2021-09-22
EDP21	20642e	Medellin	Alcazara	Cl 48 B# 88-62	6.25954	-75.6063		Tejido	Si	Juliana Tabares	2021-09-22
EDP22	20649e	Itagui	El Roserro	Cl 47 C #59-23	6.1796	-75.6123		Tejido	Si	Liliana Roa	2021-09-22
EDP23	20652e	Medellin	Manrique	Cra 36 B # 85 B 81	6.27185	-75.5467		Tejido	Si	Liliana Roa	2021-09-23
EDP24	20654e	Envigado	Los antillos	Cra 36 D # 43 sur- 100	6.15625	-75.5885		Tejido	Si	Liliana Roa	2021-09-24
EDP25	20785e	La estrella		Cl 98 sur #46-155	6.12638	-75.6286		Tejido	Si	Liliana Roa	2021-09-30
EDP26	20511e	Medellin	Florencia	Cr 68# 115	6.28959	-75.5726		Tejido	Si	Johana Perez	2021-09-13
EDP27	20806e	Medellin	belen corazoncito	Cl 34 A cr 118	6.23998	-75.5844		Tejido	Si	Liliana Roa	2021-09-30
EDP28	20828e	Medellin	Poblado	Cl 10 a #22 - 04	6.20832	-75.5528	1.778	Tejido	Si	Liliana Roa	2021-10-04
EDP29	20830e	Medellin	Laureles campestre	Cra33 c# 88A 01	6.24139	-75.614	1.596	Tejido	Si	Liliana Roa	2021-10-04
EDP30	20867e	Bello	tierra adentro	Cl 77 #67-60	6.35438	-75.5706	1.557	Tejido	Si	Carolina Henao	2021-10-07
EDP31	20866e	Bello		Cl 40#59B-30	6.3266	-75.5704	1.563	Tejido	Si	Carolina Henao	2021-10-07
EDP32	20970e	Medellin	Juan 23	Cra 99DD#49A-20	6.26599	-75.6137		Tejido	Si	Liliana Roa	2021-10-14
EDP33	20942e	Copacabana		Cl 50 #34-7	6.3538	-75.4998		Tejido	Si	Liliana Roa	2021-10-14
EDP34	20968e	Medellin	Pedregal	Cl104 #67-120	6.30077	-75.5681		Tejido	Si	Liliana Roa	2021-10-14
EDP35	20965e	Medellin	Las palmas	Cl 40#90-04	6.25053	-75.6097		Tejido	Si	Juliana Tabares	2021-10-20
EDP36	21050e	Medellin		Cra 63 A#94A475	6.29338	-75.5645		Tejido	Si	Juliana Tabares	2021-10-20
EDP37	20983e	Medellín	El diamante	Cl 16 B sur-4191	6.18783	-75.5758		Tejido	Si	Sara Cardona	2021-10-15
EDP38	21190e	Medellin	La colinita	Cra 53c #11FFsur-24	6.20109	-75.5888		Tejido	Si	Carolina Henao	2021-10-21
EDP39	21614e	La estrella		Cl 77 E sur # 50 - 106	6.15728	-75.6269		Tejido	Si	Sara Cardona	2021-10-29
EDP40	21563e	Medellin		Cra 114 C Cl 34 AA - 10	6.25517	-75.6253		Tejido	Si	Johana Perez	2021-10-09
EDP41	2100e	Medellin	Los balsos	Cl 98 sur 25 30	6.29403	-75.5715		Tejido	Si	Sara Cardona	2021-10-15
EDP42	21253e	Medellin	Tricentenario	Cra 64 # 96 A 04	6.29064	-75.5674		Tejido	Si	Liliana Roa	2021-10-26
EDP43	21470e	Medellin		Cl 99 C # 9B -10	6.28965	-75.5469		Tejido	Si	Liliana Roa	2021-11-03
EDP44	21471e	Medellin		Cra 70 # 74	6.27446	-75.58		Tejido	Si	Liliana Roa	2021-11-03
EDP45	21508e	Itagui		Cl 46 # 48 -63	6.16904	-75.6114	1.789	Tejido	Si	Carolina Henao	2021-11-04
EDP46	21557e	Medellin		Cra. 65 #7-55	6.21521	-75.5866		Tejido	Si	Johana Perez	2021-11-07
EDP47	21761e	Medellin		Cra 91 D 48 C- 14	6.25952	-75.6076		Tejido	Si	Johana Perez	2021-11-07
EDP48	21369e	Medellin	Calasanz	Cra 81b # 54 A- 43	6.26965	-75.5975		Tejido	Si	Johana Perez	2021-11-07
EDP49	21605e	Bello	El bosque	Dg 42 f # 34 11	6.33047	-75.5375		Tejido	Si	Sara Cardona	2021-10-29
EDP50	21382e	Medellin	Jardín Botánico	Cl 44 # 92-21	6.25329	-75.6095		Tejido	Si	Johana Perez	2021-11-07
EDP51	21365e	Envigado		Cl 46a Sur #20	6.16651	-75.6004		Tejido	Si	Johana Perez	2021-11-08
EDP52	21541e	Medellin	Boyacá - Las brisas	Cra 64d # 42b-111	6.24726	-75.5822		Tejido	Si	Johana Perez	2021-11-08
EDP53	21591e	Medellin		Cra 63 # 101 C -507	6.30453	-75.558		Tejido	Si	Liliana Roa	2021-10-25
EDP54	20594e	Medellin		Cra73 # 18-02	6.22291	-75.5952		Tejido	Si	Johana Perez	2021-09-20
EDP55	20595e	Copacabana		Cra 57 A # 48 -148	6.34401	-75.5124		Tejido	Si	Johana Perez	2021-09-20
EDP56	20372e	Medellin	Belen rincon	Cra 79AA # 1A sur -280 casa 250	6.20891	-75.603		Tejido	Si	Johana Perez	2021-09-20
EDP57	20562e	Envigado	Loma escobero	Cl 56#18 A#24	6.14824	-75.5615		Tejido	Si	Johana Perez	2021-09-20
EDP58	20437e	Medellin		Cl 43B # 120 D-83	6.25995	-75.6294		Tejido	Si	Carolina Henao	2021-09-09
EDP60	20449e	Medellin	flormas	Cra74 # 118-36	6.31108	-75.5687		Tejido	Si	Sara Cardona	2021-09-10
EDP61	20511e	Medellin	Florencia	Cr 68# 115	6.28959	-75.5726		Tejido	Si	Johana Perez	2021-09-13
EDP62	20529e	Medellín	Poblado	Cra 43 #25A-112	6.22514	-75.5682		Tejido	Si	Carolina Henao	2021-09-19
EDP63	20390e	Medellin	Belen alta vista	Cll 18 # 90-68	6.22278	-75.6134	1.597	Tejido	Si	Johana Perez	2021-09-06
EDP64	20417e	Medellin	Juan 23	Cl 49 # 99CC-54	6.26164	-75.6105		Tejido	Si	Liliana Roa	2021-09-07
EDP65	20396e	Medellin	San Diego	Cr 42 A# 30D8	6.20482	-75.5709		Tejido	Si	Johana Perez	2021-09-06
EDP66	20596e	Envigado	San Jose	Cl 90 sur 30	6.16251	-75.5825		Tejido	Si	Johana Perez	2021-09-20
EDP67	21676e	Medellin	Belencito el corazón	Cl 34B # 13C - 27	6.24097	-75.586		Tejido	Si	Liliana Roa	2021-09-16
EDP68	21699e	Medellin		Cl 73 #5114	6.27226	-75.5637		Tejido	Si	Juliana Tabares	2021-11-17
EDP69	21690e	Medellin		Cra 29 D# sur -121	6.19454	-75.5646		Tejido	Si	Carolina Henao	2021-11-18
EDP70	21706e	Medellin		Cra 83 # 32 DD 30	6.23786	-75.6062		Tejido	Si	Carolina Henao	2021-11-18
EDP71	21730e	Medellin	villa hermosa	Cl 25 AB # 55-28	6.24366	-75.547		Tejido	Si	Liliana Roa	2019-11-19
EDP72	21731e	Medellin	Robledo	Cl 80 B # 89 13	6.2882	-75.5894		Tejido	Si	Liliana Roa	2021-11-19
EDP73	21802e	Medellin	Enciso- pinal	Cl 56 BB # 21- 91	6.24077	-75.5438		Tejido	Si	Juliana Tabares	2021-11-22
EDP74	20968e	Medellin		Cl 104 # 67 - 120	6.30063	-75.5682		Tejido	Si	Liliana Roa	2021-10-20
EDP75	21768e	La Estrella		Cra. 55 #80 Sur177	6.15263	-75.6365		Tejido	Si	Johana Perez	2021-11-19
EDP76	22104e	Medellín	Belén la playa	Cra. 73 #14-13	6.2217	-75.596		Tejido	Si	Liliana Roa	2021-12-03
EDP77	21937e	Envigado		Cl. 45a Sur #39b2	6.16132	-75.5897		Tejido	Si	Liliana Roa	2021-12-03
EDP78	21697e	Medellin	Pedregal		6.30214	-75.5763		Tejido	Si	Juliana Tabares	2021-11-17
ENV-01	N/A	Envigado			6.15452	-75.5776		Pelo, Heces, Saliva	si	Tomás Villada Cadavid	2022-01-05
ENV-02	N/A	Envigado			6.15452	-75.5776		Pelo, Heces, Saliva	si	Tomás Villada Cadavid	2022-01-06
ENV-03	N/A	Envigado			6.16976	-75.565		Pelo, Saliva	si	Tomás Villada Cadavid	2022-01-18
ENV-04	N/A	Envigado			6.16979	-75.5649		Pelo, Heces, Saliva	si	Tomás Villada Cadavid	2022-01-18
ENV-05	N/A	Envigado			6.16979	-75.5649		Pelo, Heces, Saliva	si	Tomás Villada Cadavid	2022-01-19
ENV-06	N/A	Envigado			6.16976	-75.565		Pelo, Saliva		Tomás Villada Cadavid	2022-01-19
ENV-07	N/A	Envigado			6.16966	-75.5651		Pelo, Heces, Saliva		Tomás Villada Cadavid	2022-01-19
ENV-08	N/A	Envigado			6.16976	-75.565		Pelo, Saliva		Tomás Villada Cadavid	2022-01-20
ENV-09	N/A	Envigado			6.16966	-75.5651		Pelo, Heces, Saliva		Tomás Villada Cadavid	2022-01-20
EST-01	N/A	La Estrella			6.1516	-75.6482		Pelo, Heces, Saliva	si	Tomás Villada Cadavid	2022-01-12
EST-02	N/A	La Estrella			6.12631	-75.6356		Pelo,heces, Carillo		Tomás Villada Cadavid	2022-03-02
UdeA-01	N/A	Medellin			6.26616	-75.5688		Pelo, Heces, Saliva		Tomás Villada Cadavid	2022-02-08

## Sheet: Hoja2
Information about each individual of Didelphis marsupialis included in this study
Cod	Municipality	Lat	Lon	Date	Microsatellites	DNA Sequence
EDP30	Bello	6.35438	-75.5706	2021-10-07	x	x
EDP31	Bello	6.3266	-75.5704	2021-10-07	x
EDP49	Bello	6.33047	-75.5375	2021-10-29		x
EDP33	Copacabana	6.3538	-75.4998	2021-10-14	x	x
EDP09	Envigado	6.16976	-75.5697	2021-09-10	x	x
EDP24	Envigado	6.15625	-75.5885	2021-09-24		x
EDP57	Envigado	6.14824	-75.5615	2021-09-20	x	x
EDP66	Envigado	6.16251	-75.5825	2021-09-20	x	x
EDP77	Envigado	6.16132	-75.5897	2021-12-03	x	x
EDP22	Itagui	6.1796	-75.6123	2021-09-22	x	x
EDP13	La Estrella	6.15078	-75.6419	2021-09-16		x
EDP25	La estrella	6.12638	-75.6286	2021-09-30		x
EDP75	La Estrella	6.15263	-75.6365	2021-11-19	x
EDP01	Medellín	6.24862	-75.6016	2021-09-06	x	x
EDP02	Medellín	6.2471	-75.5586	2021-09-06	x	x
EDP03	Medellín	6.18709	-75.5637	2021-09-09	x	x
EDP05	Medellín	6.20832	-75.5528	2021-10-04	x	x
EDP06	Medellín	6.27701	-75.5969	2021-10-01	x	x
EDP07	Medellín	6.26338	-75.5406	2021-09-28	x	x
EDP08	Medellín	6.26622	-75.5909	2021-09-08	x	x
EDP10	Medellín	6.23585	-75.5844	2021-09-10		x
EDP11	Medellín	6.20738	-75.5594	2021-09-14	x	x
EDP12	Medellín	6.26477	-75.5903	2021-09-15	x	x
EDP14	Medellín	6.24593	-75.6099	2021-09-16		x
EDP16	Medellín	6.20662	-75.56	2021-09-14	x	x
EDP17	Medellín	6.2832	-75.6072	2021-09-21	x	x
EDP18	Medellín	6.26525	-75.5919	2021-09-21	x	x
EDP19	Medellín	6.29962	-75.5697	2021-09-21	x	x
EDP20	Medellín	6.30635	-75.5502	2021-09-22	x	x
EDP21	Medellín	6.25954	-75.6063	2021-09-22		x
EDP23	Medellín	6.27185	-75.5467	2021-09-23	x	x
EDP26	Medellín	6.28959	-75.5726	2021-09-13	x	x
EDP27	Medellín	6.23998	-75.5844	2021-09-30	x	x
EDP28	Medellín	6.20832	-75.5528	2021-10-04		x
EDP29	Medellín	6.24139	-75.614	2021-10-04	x	x
EDP32	Medellín	6.26599	-75.6137	2021-10-14	x	x
EDP34	Medellín	6.30077	-75.5681	2021-10-14		x
EDP35	Medellín	6.25053	-75.6097	2021-10-20	x
EDP36	Medellín	6.29338	-75.5645	2021-10-20	x	x
EDP38	Medellín	6.20109	-75.5888	2021-10-21		x
EDP40	Medellín	6.25517	-75.6253	2021-10-09		x
EDP41	Medellín	6.29403	-75.5715	2021-10-15	x	x
EDP42	Medellín	6.29064	-75.5674	2021-10-26	x	x
EDP43	Medellín	6.28965	-75.5469	2021-11-03		x
EDP44	Medellín	6.27446	-75.58	2021-11-03	x	x
EDP46	Medellín	6.21521	-75.5866	2021-11-07		x
EDP47	Medellín	6.25952	-75.6076	2021-11-07		x
EDP48	Medellín	6.26965	-75.5975	2021-11-07		x
EDP50	Medellín	6.25329	-75.6095	2021-11-07	x	x
EDP54	Medellín	6.22291	-75.5952	2021-09-20	x
EDP56	Medellín	6.20891	-75.603	2021-09-20	x
EDP58	Medellín	6.25995	-75.6294	2021-09-09	x	x
EDP60	Medellín	6.31108	-75.5687	2021-09-10		x
EDP62	Medellín	6.22514	-75.5682	2021-09-19	x
EDP64	Medellín	6.26164	-75.6105	2021-09-07		x
EDP65	Medellín	6.20482	-75.5709	2021-09-06	x	x
EDP67	Medellín	6.24097	-75.586	2021-09-16	x	x
EDP68	Medellín	6.27226	-75.5637	2021-11-17	x
EDP69	Medellín	6.19454	-75.5646	2021-11-18	x
EDP70	Medellín	6.23786	-75.6062	2021-11-18	x
EDP71	Medellín	6.24366	-75.547	2019-11-19	x
EDP72	Medellín	6.2882	-75.5894	2021-11-19	x	x
EDP73	Medellín	6.24077	-75.5438	2021-11-22	x	x
EDP74	Medellín	6.30063	-75.5682	2021-10-20	x	x
EDP76	Medellín	6.2217	-75.596	2021-12-03	x	x
EDP78	Medellín	6.30214	-75.5763	2021-11-17	x	x
