# Supplementary material for: Diversity and spatial genetic structure of the common opossum (Didelphis marsupialis) in an urban matrix of Northwestern Colombia
Source: Springer Nature journal article supplement (doi:10.1007/s42991-024-00434-2), 2024-07-24
Supplement: MOESM2 [file 42991_2024_434_MOESM2_ESM.xlsx]

## Sheet: Hoja3
Records of released opossums (Didelphis marsupialis) in AMVA between 2020 and 2022
Date	Number of animals	Municipality	Locality	Latitude	Longitude
2020-07-16	17	Medellín	San Antonio de Prado, Reserva Astilleros	6.22188	-75.5086
2020-07-23	10	Barbosa	Reserva La Quintero	6.41789	-75.3106
2020-08-07	2	Envigado	Loma El Escobero	6.24387	-75.5219
2020-08-27	1	Medellín	Santa Elena	6.2586	-75.6685
2020-08-28	8	Barbosa	La Montaña	-	-
2020-09-24	7	Envigado	Reserva La Morena	6.11865	-75.5848
2020-11-14	15	Envigado	Finca Pachamama	-	-
2020-11-20	4	Barbosa	La Montaña	-	-
2020-12-16	11	Medellín	Santa Elena, Parque Arví	6.2808	-75.5025
2021-01-08	15	Medellín	Santa Elena, La Aguada	-	-
2021-02-09	9	Sabaneta	Reserva Natural La Romera	6.13755	-75.5704
2021-02-19	12	La Estrella	Reserva Natural El Romeral	6.12679	-75.5996
2021-03-19	20	Barbosa	La Montaña	-	-
2021-04-30	18	Medellín	Santa Elena, La Aguada	-	-
2021-06-01	1	Envigado	Loma El Escobero	6.24387	-75.5219
2021-06-02	2	Envigado	Loma El Escobero	6.24387	-75.5219
2021-06-03	1	Envigado	Loma El Escobero	6.24387	-75.5219
2021-06-04	3	Envigado	Loma El Escobero	6.24387	-75.5219
2021-06-05	1	Envigado	Loma El Escobero	6.24387	-75.5219
2021-06-06	1	Envigado	Loma El Escobero	6.24387	-75.5219
2021-06-08	2	Bello	Vereda Buenavista	-	-
2021-06-09	3	Bello	Vereda Buenavista	-	-
2021-06-11	1	Envigado	Reserva La Morena	6.11865	-75.5848
2021-06-12	2	Envigado	Loma El Escobero	6.24387	-75.5219
2021-06-13	1	Envigado	Reserva La Morena	6.11865	-75.5848
2021-06-15	10	Barbosa	Vía Vereda Isaza	6.4205	-75.3565
2021-06-15	15	Sabaneta	Reserva Natural La Romera	6.13755	-75.5704
2021-06-16	2	Sabaneta	Reserva Natural La Romera	6.13755	-75.5704
2021-06-17	1	Envigado	Reserva La Morena	6.11865	-75.5848
2021-06-20	1	Envigado	Reserva La Morena	6.11865	-75.5848
2021-06-20	1	Envigado	Loma El Escobero	6.24387	-75.5219
2021-06-22	1	Envigado	Loma El Escobero	6.24387	-75.5219
2021-06-22	2	Barbosa	Vía Vereda Isaza	6.4205	-75.3565
2021-06-29	1	Envigado	Reserva La Morena	6.11865	-75.5848
2021-06-30	17	Medellín	Santa Elena, La Aguada	-	-
2021-06-30	3	Medellín	Santa Elena, La Aguada	-	-
2021-07-03	1	Envigado	Loma El Escobero	6.24387	-75.5219
2021-07-14	1	Medellín	Vía Santa Elena	6.18609	-75.6733
2021-07-14	2	Envigado	Loma El Escobero - CVZ	6.24387	-75.5219
2021-07-15	2	Envigado	Loma El Escobero - CVZ	6.24387	-75.5219
2021-07-16	1	Envigado	Loma El Escobero - CVZ	6.24387	-75.5219
2021-07-20	1	Envigado	Loma El Escobero	6.24387	-75.5219
2021-07-23	1	Envigado	Loma El Escobero	6.24387	-75.5219
2021-07-24	1	Envigado	Vereda El Vallano, Ayurá	6.16002	-75.5547
2021-07-25	1	Envigado	Vereda El Vallano, Ayurá	6.16002	-75.5547
2021-07-27	1	Envigado	Transversal de la Montaña	6.14829	-75.5577
2021-07-28	2	Envigado	Loma El Escobero	6.24387	-75.5219
2021-08-07	1	Envigado	Loma El Escobero - CVZ	6.24387	-75.5219
2021-08-07	1	Medellín	Vía Santa Elena	6.18609	-75.6733
2021-08-12	1	Envigado	Loma El Escobero	6.24387	-75.5219
2021-08-13	1	Caldas	La Clara	6.16285	-75.6668
2021-08-14	2	Caldas	La Clara	6.16285	-75.6668
2021-08-14	2	Envigado	Loma El Escobero	6.24387	-75.5219
2021-08-19	1	Envigado	Loma El Escobero	6.24387	-75.5219
2021-08-22	1	Envigado	Reserva La Morena	6.11865	-75.5848
2021-08-24	3	Envigado	Loma El Escobero - CVZ	6.24387	-75.5219
2021-08-25	1	Envigado	Loma El Escobero - CVZ	6.24387	-75.5219
2021-08-26	1	Envigado	Loma El Escobero - CVZ	6.24387	-75.5219
2021-08-30	1	Envigado	Loma El Escobero - CVZ	6.24387	-75.5219
2021-08-31	1	Sabaneta	Reserva Natural La Romera	6.13755	-75.5704
2021-08-31	1	Medellín	Santa Elena	6.2586	-75.6685
2021-08-31	1	Envigado	Loma El Escobero - CVZ	6.24387	-75.5219
2021-09-01	2	Medellín	Santa Elena	6.2586	-75.6685
2021-09-02	1	Medellín	Santa Elena	6.2586	-75.6685
2021-09-03	2	Medellín	San Antonio de Prado	6.28039	-75.5026
2021-09-04	1	Medellín	Santa Elena	6.2586	-75.6685
2021-09-09	1	Envigado	Loma El Escobero	6.24387	-75.5219
2021-09-12	1	Envigado	Loma El Escobero	6.24387	-75.5219
2021-09-12	1	Medellín	Santa Elena, La Aguada	-	-
2021-09-13	1	Envigado	Loma El Escobero	6.24387	-75.5219
2021-09-13	1	Medellín	Santa Elena, La Aguada	-	-
2021-09-14	1	Envigado	Loma El Escobero	6.24387	-75.5219
2021-09-16	1	Envigado	Loma El Escobero	6.24387	-75.5219
2021-09-17	2	Envigado	Loma El Escobero	6.24387	-75.5219
2021-09-19	4	Envigado	Loma El Escobero	6.24387	-75.5219
2021-09-20	1	Envigado	Loma El Escobero	6.24387	-75.5219
2021-09-21	2	Sabaneta	Reserva Natural La Romera	6.13755	-75.5704
2021-09-22	1	Envigado	Loma El Escobero	6.24387	-75.5219
2021-09-22	1	La Estrella	Alto de los Pinos	6.14151	-75.5787
2021-09-23	1	Envigado	Loma El Escobero	6.24387	-75.5219
2021-09-25	1	Envigado	Loma El Escobero	6.24387	-75.5219
2021-09-29	2	Sabaneta	Reserva Natural La Romera	6.13755	-75.5704
2021-09-30	1	Envigado	Loma El Escobero	6.24387	-75.5219
2021-09-30	1	Sabaneta	Reserva Natural La Romera	6.13755	-75.5704
2021-10-02	1	Sabaneta	Reserva Natural La Romera	6.13755	-75.5704
2021-10-03	1	Sabaneta	Reserva Natural La Romera	6.13755	-75.5704
2021-10-04	1	Medellín	Vía Santa Elena	6.18609	-75.6733
2021-10-05	1	Envigado	Loma El Escobero - CVZ	6.24387	-75.5219
2021-10-09	1	Envigado	Loma El Escobero	6.24387	-75.5219
2021-10-12	1	Envigado	Reserva La Morena	6.11865	-75.5848
2021-10-14	1	Envigado	Loma El Escobero	6.24387	-75.5219
2021-10-17	1	Medellín	Santa Elena	6.2586	-75.6685
2021-10-17	1	Sabaneta	Reserva Natural La Romera	6.13755	-75.5704
2021-10-20	1	Sabaneta	Reserva Natural La Romera	6.13755	-75.5704
2021-10-20	1	Envigado	Loma El Escobero	6.24387	-75.5219
2021-10-21	1	Sabaneta	Reserva Natural La Romera	6.13755	-75.5704
2021-10-22	1	Envigado	Loma El Escobero	6.24387	-75.5219
2021-10-22	3	Envigado	Loma El Escobero	6.24387	-75.5219
2021-10-25	1	Envigado	Loma El Escobero	6.24387	-75.5219
2021-10-27	2	Envigado	Loma El Escobero	6.24387	-75.5219
2021-10-29	6	Barbosa	La Montaña	-	-
2021-10-31	1	Envigado	Loma El Escobero	6.24387	-75.5219
2021-11-01	1	Envigado	Loma El Escobero	6.24387	-75.5219
2021-11-02	3	Medellín	Vía Santa Elena	6.18609	-75.6733
2021-11-05	2	Envigado	Loma El Escobero	6.24387	-75.5219
2021-11-06	1	Envigado	Loma El Escobero	6.24387	-75.5219
2021-11-07	1	Envigado	Loma del Chocho	6.13146	-75.5508
2021-11-08	1	Envigado	Loma El Escobero	6.24387	-75.5219
2021-11-09	1	Envigado	Loma El Escobero	6.24387	-75.5219
2021-11-10	1	Medellín	Vía Santa Elena	6.18609	-75.6733
2021-11-11	2	Medellín	Vía Santa Elena	6.18609	-75.6733
2021-11-14	1	Envigado	Loma El Escobero	6.24387	-75.5219
2021-11-15	1	Envigado	Parque El Salado	6.10798	-75.5488
2021-11-15	1	Envigado	Loma El Escobero	6.24387	-75.5219
2021-11-16	1	Envigado	Reserva La Morena	6.11865	-75.5848
2021-11-18	1	Envigado	Reserva La Morena	6.11865	-75.5848
2021-11-20	3	Envigado	Loma El Escobero	6.24387	-75.5219
2021-11-21	1	Envigado	Parque El Salado	6.10798	-75.5488
2021-11-21	1	Envigado	Loma El Escobero	6.24387	-75.5219
2021-11-21	1	Sabaneta	Reserva Natural La Romera	6.13755	-75.5704
2021-11-22	1	Envigado	Loma El Escobero	6.24387	-75.5219
2021-11-22	1	Medellín	Vía Santa Elena	6.18609	-75.6733
2021-11-23	1	Envigado	Loma El Escobero	6.24387	-75.5219
2021-11-25	1	Envigado	Transversal de la Montaña	6.14829	-75.5577
2021-11-27	1	Envigado	Loma El Escobero	6.24387	-75.5219
2021-11-28	2	Envigado	Loma El Escobero	6.24387	-75.5219
2021-11-29	3	Envigado	Parque El Salado	6.10798	-75.5488
2021-12-01	1	Envigado	Loma El Escobero	6.24387	-75.5219
2021-12-06	1	Sabaneta	Reserva Natural La Romera	6.13755	-75.5704
2021-12-08	1	Envigado	Loma El Escobero	6.24387	-75.5219
2021-12-10	1	Envigado	Loma El Escobero	6.24387	-75.5219
2021-12-15	1	Envigado	Loma El Escobero	6.24387	-75.5219
2021-12-17	1	Envigado	Parque El Salado	6.10798	-75.5488
2021-12-19	1	Envigado	Loma El Escobero	6.24387	-75.5219
2021-12-23	1	Envigado	Parque El Salado	6.10798	-75.5488
2021-12-27	9	Medellín	Santa Elena, La Aguada	-	-
2022-01-01	1	Barbosa	Vía Vereda Isaza	6.4205	-75.3565
2022-01-01	1	Envigado	Parque El Salado	6.10798	-75.5488
2022-01-03	1	Envigado	Loma El Escobero	6.24387	-75.5219
2022-01-06	1	Sabaneta	Reserva Natural La Romera	6.13755	-75.5704
2022-01-06	1	Barbosa	Vía Vereda Isaza	6.4205	-75.3565
2022-01-12	18	Envigado	La Catedral	6.24387	-75.5219
2022-01-15	3	Envigado	Loma El Escobero	6.24387	-75.5219
2022-01-16	3	Envigado	Transversal de la Montaña	6.14829	-75.5577
2022-01-16	1	Envigado	Loma El Escobero	6.24387	-75.5219
2022-01-20	1	Medellín	Santa Elena	6.2586	-75.6685
2022-01-21	1	Envigado	Reserva La Morena	6.11865	-75.5848
2022-01-23	1	Envigado	La Catedral	6.24387	-75.5219
2022-01-24	4	Envigado	Loma El Escobero	6.24387	-75.5219
2022-01-25	1	Envigado	Loma El Escobero	6.24387	-75.5219
2022-01-26	1	Medellín	Santa Elena	6.2586	-75.6685
2022-01-27	3	Medellín	Santa Elena	6.2586	-75.6685
2022-01-28	16	Medellín	Santa Elena, La Aguada	-	-
2022-01-29	4	Sabaneta	Reserva Natural La Romera	6.13755	-75.5704
2022-01-31	1	Barbosa	Vía Vereda Isaza	6.4205	-75.3565
2022-02-01	1	Envigado	Reserva La Morena	6.11865	-75.5848
2022-02-02	1	Envigado	Reserva La Morena	6.11865	-75.5848
2022-02-02	1	Envigado	Loma El Escobero	6.24387	-75.5219
2022-02-03	1	Envigado	Loma El Escobero	6.24387	-75.5219
2022-02-04	2	Envigado	Reserva La Morena	6.11865	-75.5848
2022-02-08	2	Envigado	Transversal de la Montaña	6.14829	-75.5577
2022-02-09	2	Envigado	Loma El Escobero	6.24387	-75.5219
2022-02-11	2	Envigado	La Catedral	6.24387	-75.5219
2022-02-12	1	Envigado	Transversal de la Montaña	6.14829	-75.5577
2022-02-13	1	Envigado	Transversal de la Montaña	6.14829	-75.5577
2022-02-16	2	Envigado	Loma El Escobero	6.24387	-75.5219
2022-02-19	2	Envigado	Loma El Escobero	6.24387	-75.5219
2022-02-23	1	Envigado	Loma El Escobero	6.24387	-75.5219
2022-02-23	1	Envigado	Loma El Escobero	6.24387	-75.5219
2022-02-24	1	Barbosa	Vía vereda Isaza	6.4205	-75.3565
2022-02-25	1	Envigado	Loma El Escobero	6.24387	-75.5219
2022-02-28	1	Envigado	Loma El Escobero	6.24387	-75.5219
2022-02-28	1	Sabaneta	Reserva Natural La Romera	6.13755	-75.5704
2022-03-01	1	Envigado	Loma El Escobero	6.24387	-75.5219
2022-03-02	1	Envigado	San Sebastián de la Castellana	6.16963	-75.5677
2022-03-03	1	Envigado	Loma El Escobero	6.24387	-75.5219
2022-03-04	1	Envigado	Loma El Escobero	6.24387	-75.5219
2022-03-11	2	Envigado	Loma El Escobero	6.24387	-75.5219
2022-03-14	1	Sabaneta	Reserva Natural La Romera	6.13755	-75.5704
2022-03-17	1	Envigado	Loma El Escobero	6.24387	-75.5219
2022-03-18	2	Sabaneta	Reserva Natural La Romera	6.13755	-75.5704
2022-03-19	2	Sabaneta	Reserva Natural La Romera	6.13755	-75.5704
2022-03-23	1	Envigado	Loma El Escobero	6.24387	-75.5219
2022-03-24	10	Medellín	Santa Elena, La Aguada	-	-
2022-03-25	1	Envigado	Loma El Escobero	6.24387	-75.5219
2022-03-25	1	Envigado	Loma El Escobero	6.24387	-75.5219
2022-03-25	1	Envigado	Loma El Escobero	6.24387	-75.5219
2022-03-26	1	Envigado	Loma El Escobero	6.24387	-75.5219
2022-03-30	15	Envigado	La Catedral	6.24387	-75.5219
2022-04-01	1	Sabaneta	Reserva Natural La Romera	6.13755	-75.5704
2022-04-01	1	Envigado	Loma El Escobero	6.24387	-75.5219
2022-04-02	1	Envigado	Loma El Escobero	6.24387	-75.5219
2022-04-04	1	Envigado	Loma El Escobero	6.24387	-75.5219
2022-04-04	1	Sabaneta	Reserva Natural La Romera	6.13755	-75.5704
2022-04-05	2	Girardota	Girardota	-	-
2022-04-09	2	Envigado	Loma El Escobero	6.24387	-75.5219
2022-04-11	2	Envigado	Loma El Escobero	6.24387	-75.5219
2022-04-13	1	Envigado	Loma El Escobero	6.24387	-75.5219
2022-04-14	1	Barbosa	Vía vereda Isaza	6.4205	-75.3565
2022-04-14	1	Envigado	Transversal de la Montaña	6.14829	-75.5577
2022-04-16	1	Sabaneta	Reserva Natural La Romera	6.13755	-75.5704
2022-04-17	1	Sabaneta	Reserva Natural La Romera	6.13755	-75.5704
2022-04-18	2	Envigado	Loma El Escobero	6.24387	-75.5219
2022-04-19	2	Envigado	Loma El Escobero	6.24387	-75.5219
2022-04-20	2	Envigado	Loma El Escobero	6.24387	-75.5219
2022-04-21	2	Sabaneta	Reserva Natural La Romera	6.13755	-75.5704
2022-04-22	1	Envigado	Loma El Escobero	6.24387	-75.5219
2022-04-22	1	Envigado	La Catedral	6.24387	-75.5219
2022-04-22	1	Barbosa	Vía vereda Isaza	6.4205	-75.3565
2022-04-23	2	Envigado	Loma El Escobero	6.24387	-75.5219
2022-04-24	1	Envigado	Loma El Escobero	6.24387	-75.5219
2022-04-25	1	Envigado	Loma El Escobero	6.24387	-75.5219
2022-04-26	2	Envigado	Loma El Escobero	6.24387	-75.5219
2022-04-27	1	Envigado	Transversal de la Montaña	6.14829	-75.5577
2022-04-29	1	Envigado	Loma El Escobero	6.24387	-75.5219
2022-05-05	4	Barbosa	Vía vereda Isaza	6.4205	-75.3565
2022-05-11	2	Envigado	Loma El Escobero	6.24387	-75.5219
2022-05-13	1	Envigado	Reserva La Morena	6.11865	-75.5848
2022-05-14	4	Sabaneta	Reserva Natural La Romera	6.13755	-75.5704
2022-05-17	2	Envigado	Loma El Escobero	6.24387	-75.5219
2022-05-18	2	Envigado	Loma El Escobero	6.24387	-75.5219
2022-05-19	1	Envigado	Loma El Escobero	6.24387	-75.5219
2022-05-20	7	Envigado	Loma El Escobero	6.24387	-75.5219
2022-05-24	1	Envigado	Loma El Escobero	6.24387	-75.5219
2022-05-25	2	Sabaneta	Reserva Natural La Romera	6.13755	-75.5704
2022-05-27	2	Envigado	Loma El Escobero	6.24387	-75.5219
2022-05-29	3	Barbosa	Vía vereda Isaza	6.4205	-75.3565
2022-06-03	7	Sabaneta	Reserva Natural La Romera	6.13755	-75.5704
2022-06-10	1	Copacabana	Copacabana	-	-
2022-07-02	1	Envigado	Loma El Escobero	6.24387	-75.5219
2022-07-03	2	Envigado	Loma El Escobero	6.24387	-75.5219
2022-07-05	2	Envigado	Loma El Escobero	6.24387	-75.5219
2022-07-06	2	Envigado	Loma El Escobero	6.24387	-75.5219
2022-07-07	10	Medellín	Santa Elena, La Aguada	-	-
2022-07-07	1	Envigado	Loma El Escobero	6.24387	-75.5219
2022-07-09	1	Envigado	Loma El Escobero	6.24387	-75.5219
2022-07-10	1	Envigado	Loma El Escobero	6.24387	-75.5219
2022-07-12	2	Envigado	Loma El Escobero	6.24387	-75.5219
2022-07-15	16	Barbosa	Vía vereda Isaza	6.4205	-75.3565
2022-07-15	1	Envigado	Loma El Escobero	6.24387	-75.5219
2022-07-15	1	Sabaneta	Reserva Natural La Romera	6.13755	-75.5704
2022-07-16	6	Sabaneta	Reserva Natural La Romera	6.13755	-75.5704
2022-07-17	1	Sabaneta	Reserva Natural La Romera	6.13755	-75.5704
2022-07-19	1	Envigado	Loma El Escobero	6.24387	-75.5219
2022-07-19	1	Sabaneta	Reserva Natural La Romera	6.13755	-75.5704
2022-07-22	1	Envigado	Loma El Escobero	6.24387	-75.5219
2022-07-23	2	Envigado	Loma El Escobero	6.24387	-75.5219
2022-07-24	1	Envigado	Loma El Escobero	6.24387	-75.5219
2022-07-26	2	Envigado	Loma El Escobero	6.24387	-75.5219
2022-07-27	9	Barbosa	Reserva La Quintero	6.41789	-75.3106
2022-07-29	1	Medellín	Santa Elena	6.2586	-75.6685
2022-07-30	2	Envigado	Loma El Escobero	6.24387	-75.5219
2022-08-09	10	Envigado	La Catedral	6.24387	-75.5219
2022-08-14	1	Sabaneta	Reserva Natural La Romera	6.13755	-75.5704
TOTAL	642
