# Supplementary material for: Diversity and spatial genetic structure of the common opossum (Didelphis marsupialis) in an urban matrix of Northwestern Colombia
Source: Springer Nature journal article supplement (doi:10.1007/s42991-024-00434-2), 2024-07-24
Supplement: MOESM4 [file 42991_2024_434_MOESM4_ESM.xlsx]

## Sheet: Hoja1
Primers and amplification conditions of nine microsatellite loci.
Cluster	Locus	Primer Sequence (5'–3')	Repeat Unit	Allele Range	Label	MgCl2 mM	Annealing T°
1	Mnud41	F:CAGTCGGGCGTCATCATTGTTTCCCATCCATTAGGA	(GA)5 GT (GA)22	175-237	Fam	2mM	55°C
		R:GTTTCTGGTGCAAAATAGGTGCTT
	Dm4	F:CTTGAGTTGAATTTTGAAGGA	(AG)39	307	Hex	2.5mM	56.6°C
		R:TGCACAATTGTGATAACAACA
	Dm5	F:AGCCAAACTGCCTAGCCCTT	(GT)15	242	Tamra	2mM	59°C
		R:CCATCACAGGGCCCTTGTAT
2	Dm9	F:CCCTGTCACCATTTGACTTTG	(CA)18	233	Fam	1.75mM	60°C
		R:TGGGAAAGGTGGTCTCCTG
	OP48	F:TGGAAAGATTTGAGCTTCAG	(GATA)13	198-222	Tamra	1.5mM	58.5°C
		R:GTTAAGGAATTTCTTGCATTTGG
	Dm3	F:GCTAGCTATTATTGTAACCCCC	(AG)29	197	Fam	2.5mM	55.9°C
		R:GAAATGGGTAGATTCAAGCCCC
3	Dm1	F:GTTCTTTCTGAGTACCAAATCCC	(TG)2TA(TG)7AATG(AG)17	207	Hex	3mM	63.5°C
		R:GATGCAGAAAGACAGGCACA
	OP08	F:AAGTTGCCAAACATAGATAATAAGC	(GT)19	285-293	Tamra	1.5mM	63.5°C
		R:TCACTTCTATTGTCAGATGACTTACC
	OP19	F:GCAATAGTCCAGGCATGAGG	(AC)23	233-249	Fam	1.5mM	56.6°C
		R:AACACCATCCTCTGGTTTGC
